# Supplementary material
Source: Springer Nature journal article supplement (https://www.springermedizin.de/resource/supplementary/13069_2008_5_MOESM25_ESM.pdf/9659588)

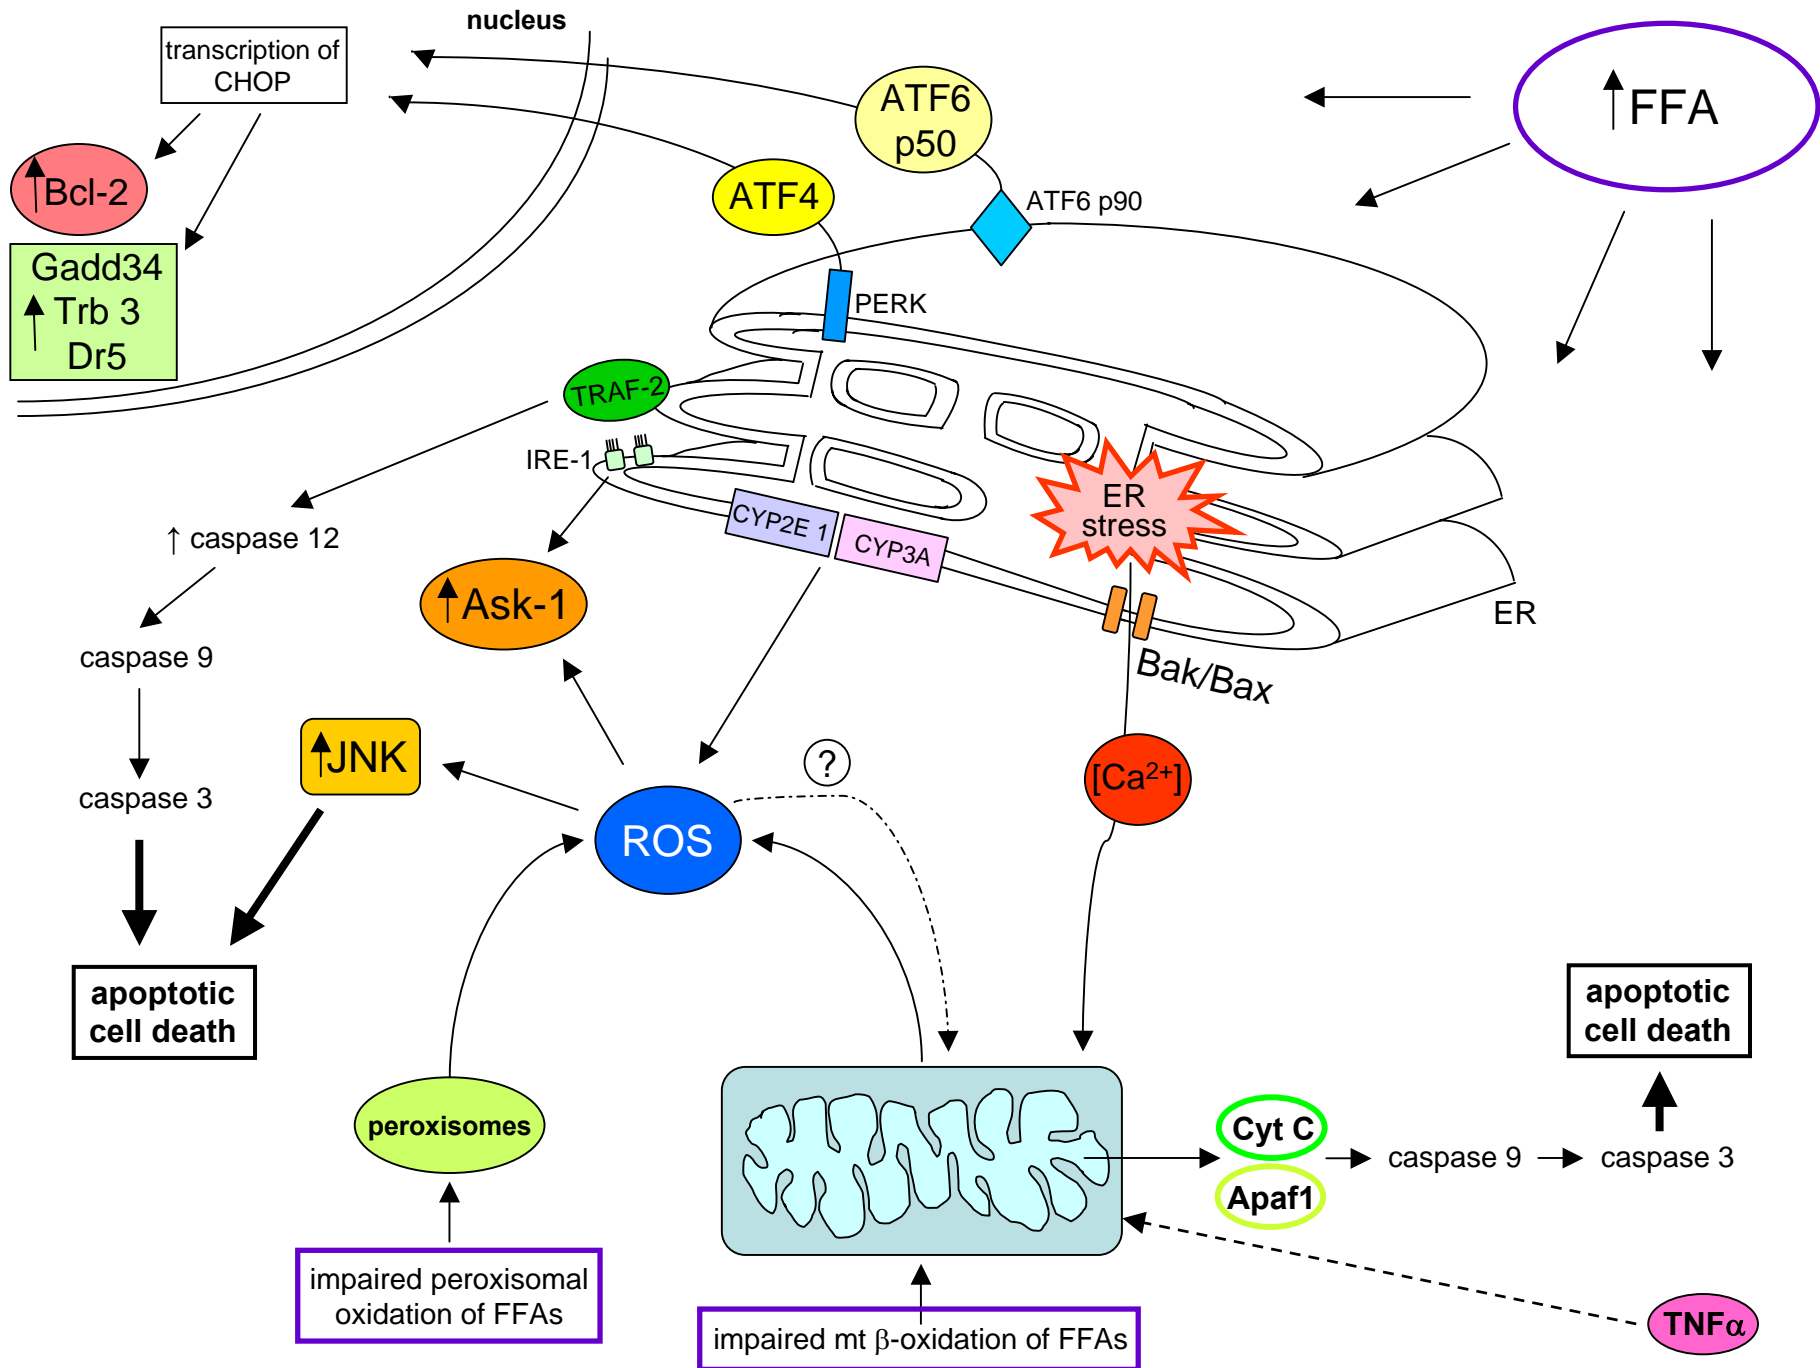

Supplement: MOESM25 [file 9659588]
